# Supplementary material for: Peptides Targeting the IF1–ATP Synthase Complex Modulate the Permeability Transition Pore in Cancer HeLa Cells
Source: MDPI journal article supplement (doi:10.3390/ijms25094655), 2024-04-25
Supplement: s1 [file s1]

# Peptides Targeting the IF1–ATP Synthase Complex Modulate the Permeability Transition Pore in Cancer HeLa Cells

Martina Grandi <sup>1,†</sup>, Simone Fabbian <sup>2,†</sup>, Giancarlo Solaini <sup>1</sup>, Alessandra Baracca <sup>1</sup>, Massimo Bellanda <sup>2,3</sup> and Valentina Giorgio <sup>1,\*</sup>

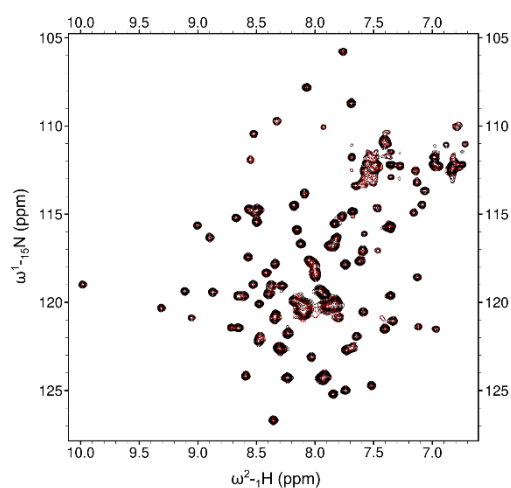

**Figure S1.** NMR spectra of the N-terminus of the OSCP subunit in the presence or absence of peptide IF1-O.3.  $^1\text{H}$ - $^{15}\text{N}$  SOFAST HMQC spectra of OSCP-NT (residues R6-G114) in the absence (red) and in presence (black) of a 10-fold molar excess of peptide IF1-O.3.

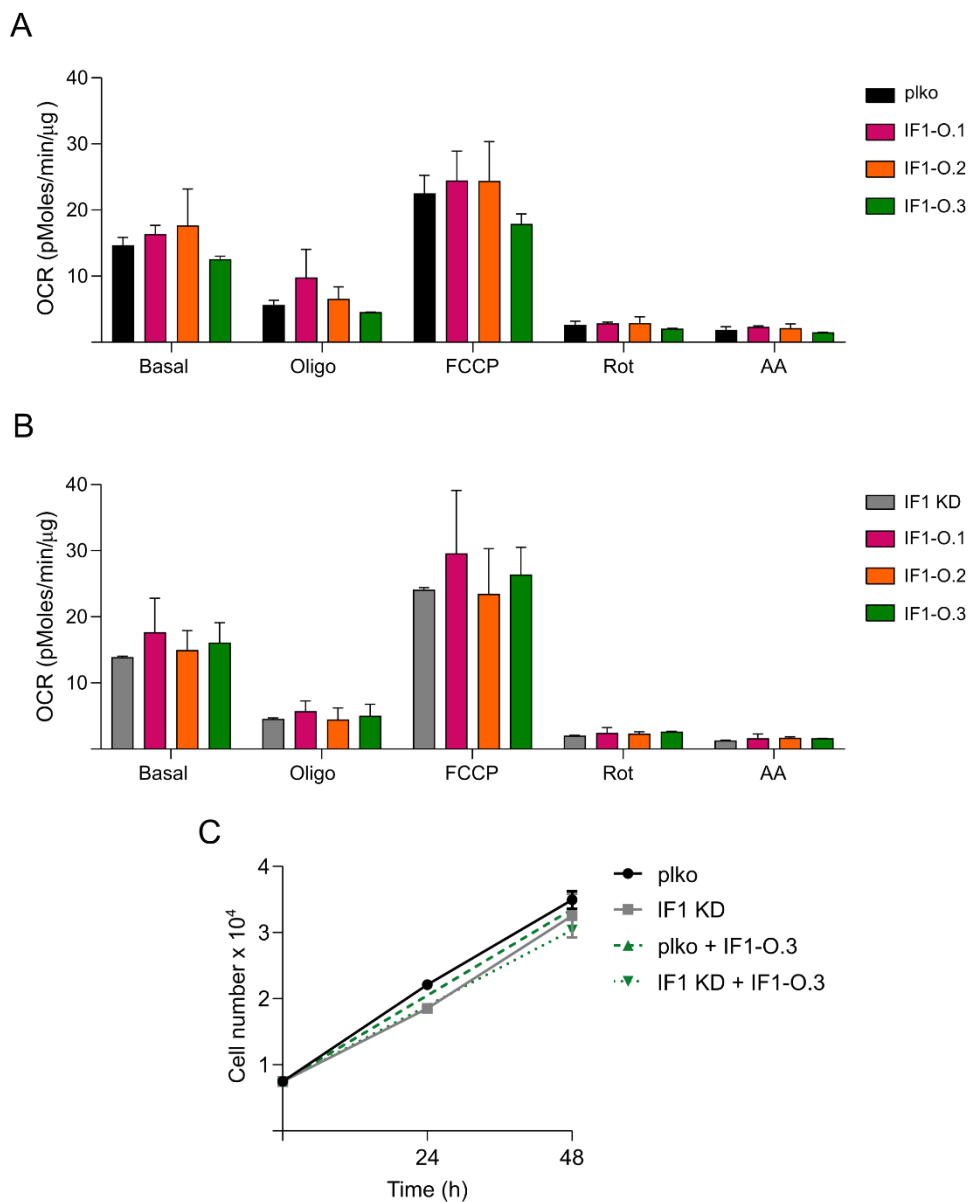

**Figure S2. Effects of peptides IF1-O.1, IF1-O.2 and IF1-O.3 on mitochondrial respiration and cell proliferation.** Normalized oxygen consumption rate (OCR) values per  $\mu\text{g}$  of protein of adherent plko (A) and IF1 KD (B) HeLa cells, treated with or without 30  $\mu\text{M}$  of membrane-permeable peptides. OCR is measured before (Basal) and after treatment with oligomycin (Oligo), carbonyl cyanide p-(trifluoromethoxy) phenylhydrazine (FCCP), rotenone (Rot) and antimycin A (AA). In A and B, cells are incubated with TAT-IF1-O.1; TAT-IF1-O.2 and TAT-IF1-O.3 for 30 min before measurements. Data are mean  $\pm$  SEM of three independent experiments. In C, cell growth is analyzed for 48 hours of plko and IF1 KD HeLa cells with or without 30  $\mu\text{M}$  TAT-IF1-O.3. Data are mean  $\pm$  SEM of three independent experiments.
